# Supplementary material for: A Better Cardiopulmonary Fitness Is Associated with Improved Concentration Level and Health-Related Quality of Life in Primary School Children
Source: MDPI journal article supplement (doi:10.3390/jcm11051326), 2022-02-28
Supplement: s1 [file s1]

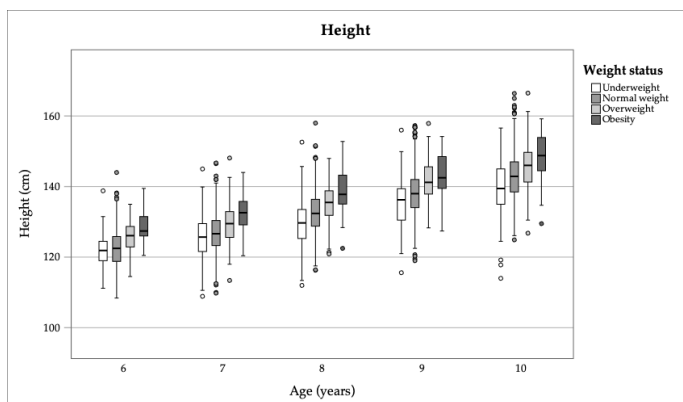

(a)

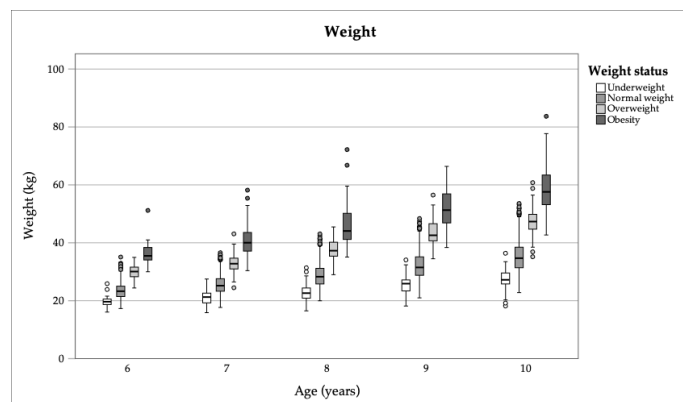

(b)

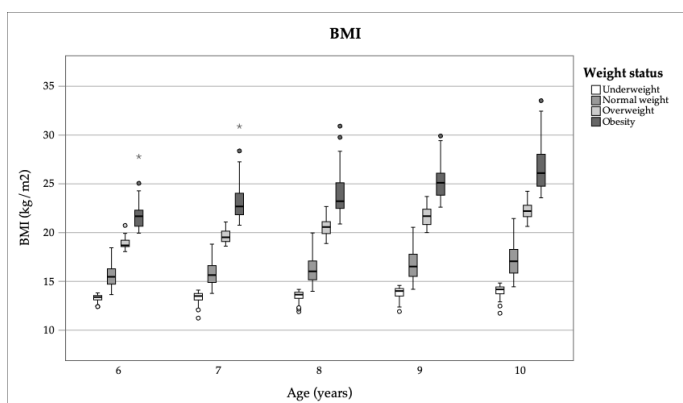

(c)

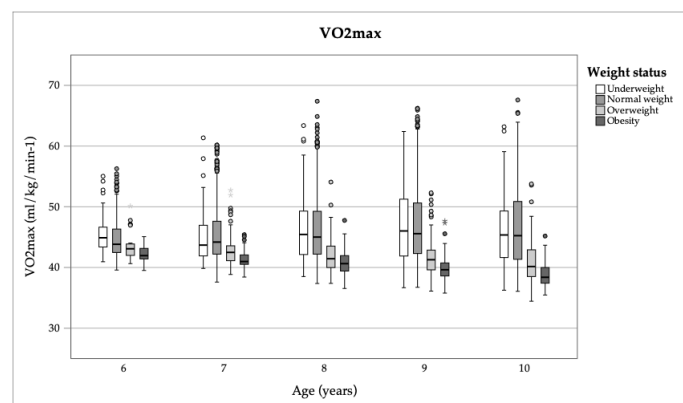

(d)

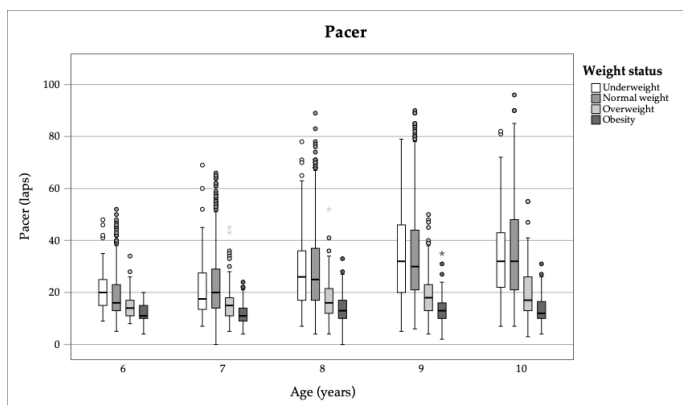

(e)

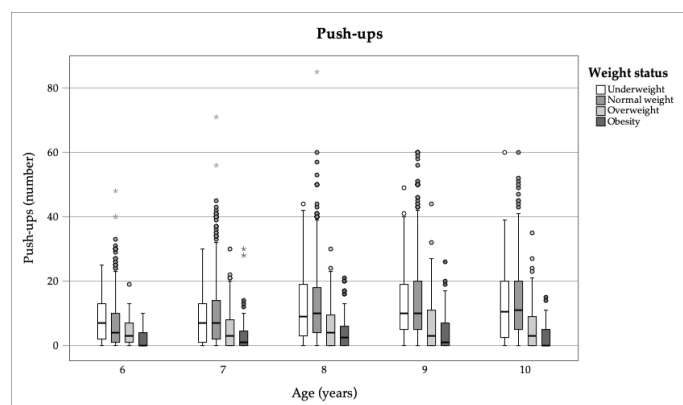

(f)

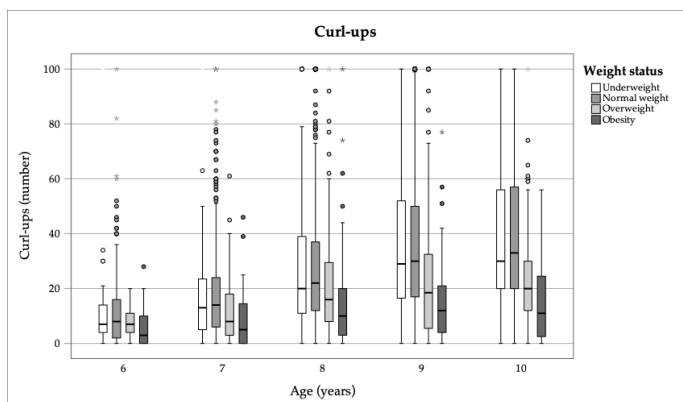

(g)

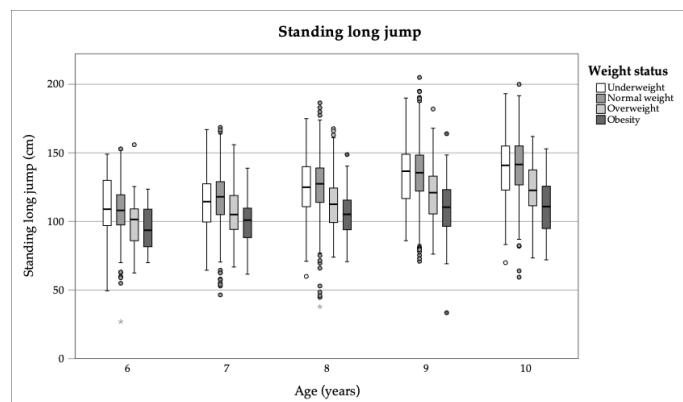

(h)

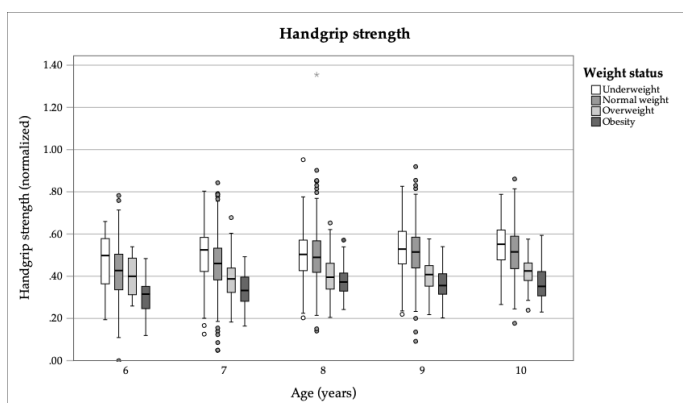

(i)

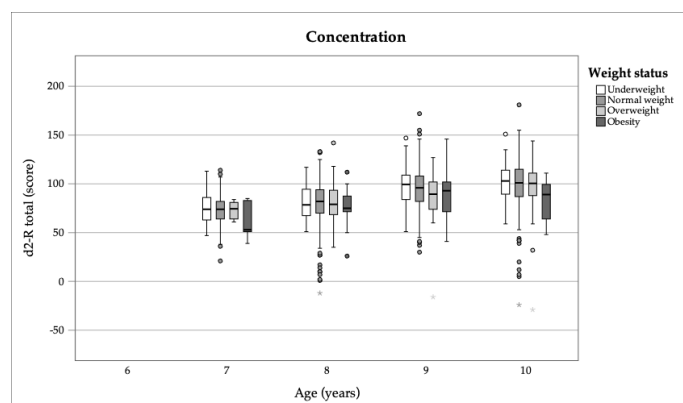

(j)

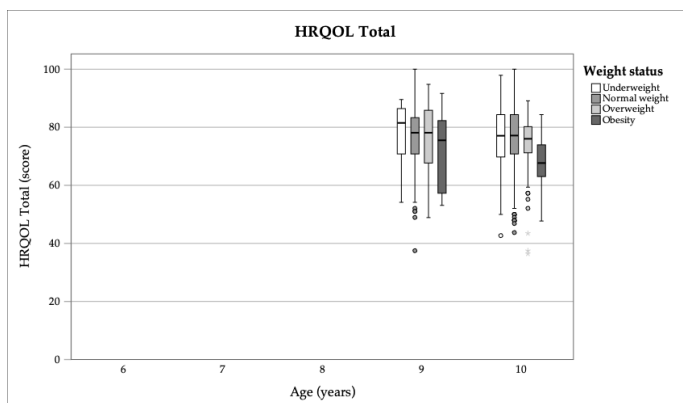

(k)

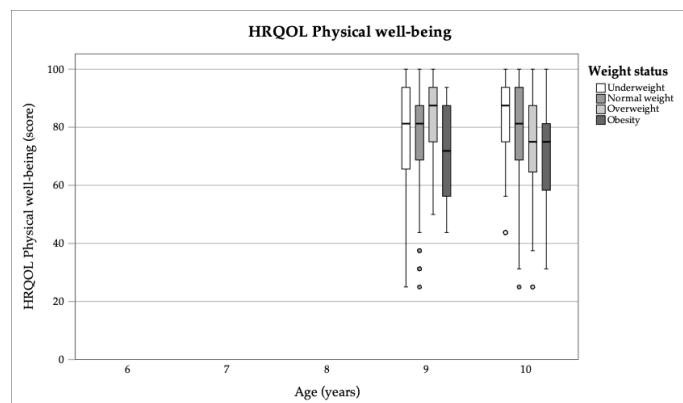

(l)

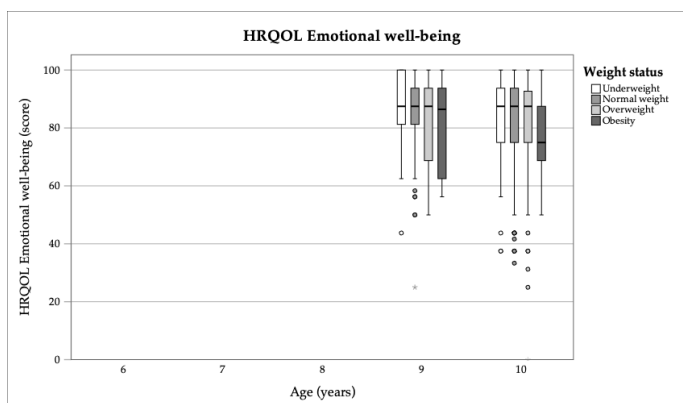

(m)

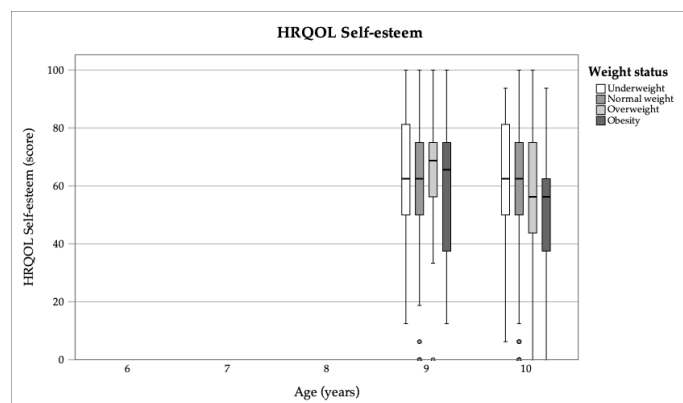

(n)

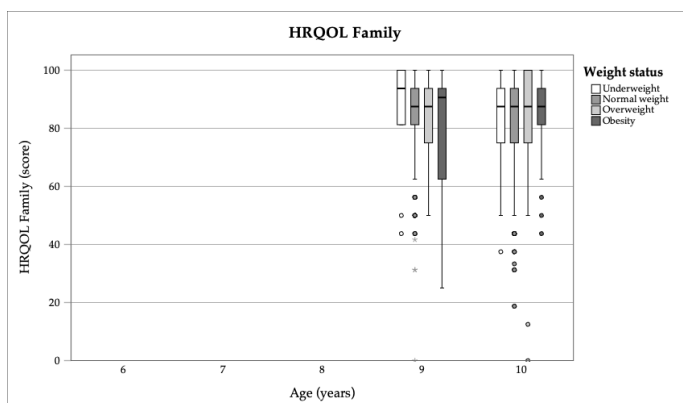

(o)

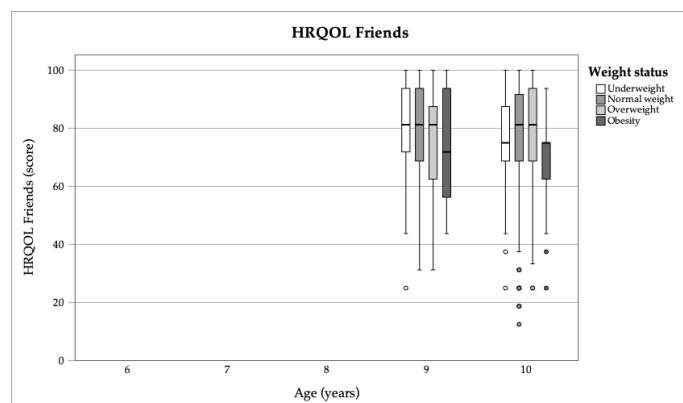

(p)

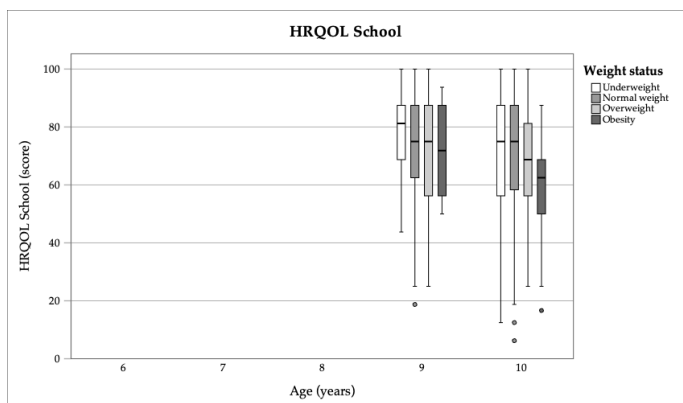

(q)

**Supplementary Figure S2.** Differences between weight classes in all parameters, (a)-(c) anthropometrics, (d) – (i) physical fitness tests, (j) concentration score, (k) – (q) health-related Quality of Life (HRQOL) sub-scales
