# Supplementary material for: A Better Cardiopulmonary Fitness Is Associated with Improved Concentration Level and Health-Related Quality of Life in Primary School Children
Source: MDPI journal article supplement (doi:10.3390/jcm11051326), 2022-02-28
Supplement: s1 [file s1]

**Supplementary Table S1.** Descriptive statistics and differences between age groups total and differentiated by boys and girls in anthropometric characteristics, physical fitness parameters, concentration and health-related quality of life.

|                                      |       | Age (years) |                                          |      |                                          |      |                                          |      |                                          |      |                                         |         |  | <i>p</i> |
|--------------------------------------|-------|-------------|------------------------------------------|------|------------------------------------------|------|------------------------------------------|------|------------------------------------------|------|-----------------------------------------|---------|--|----------|
|                                      |       | 6           |                                          | 7    |                                          | 8    |                                          | 9    |                                          | 10   |                                         |         |  |          |
|                                      |       | n           | M [CI 95%]                               | n    | M [CI 95%]                               | n    | M [CI 95%]                               | n    | M [CI 95%]                               | n    | M [CI 95%]                              |         |  |          |
| Physical Fitness                     |       |             |                                          |      |                                          |      |                                          |      |                                          |      |                                         |         |  |          |
| Height<br>(cm)                       | Total | 552         | 123.0 [122.5, 123.4] <sup>7,8,9,10</sup> | 1491 | 127.2 [126.9, 127.5] <sup>6,8,9,10</sup> | 1596 | 132.9 [132.6, 133.2] <sup>6,7,9,10</sup> | 1731 | 138.4 [138.1, 138.7] <sup>6,7,8,10</sup> | 1143 | 143.1 [142.7, 143.5] <sup>6,7,8,9</sup> | < .001* |  |          |
|                                      | Girls | 291         | 122.5 [121.9, 123.1] <sup>7,8,9,10</sup> | 761  | 126.5 [126.1, 126.9] <sup>6,8,9,10</sup> | 830  | 132.4 [132.0, 132.8] <sup>6,7,9,10</sup> | 857  | 137.9 [137.5, 138.4] <sup>6,7,8,10</sup> | 538  | 142.7 [142.1, 143.2] <sup>6,7,8,9</sup> | < .001* |  |          |
|                                      | Boys  | 261         | 123.6 [122.9, 124.2] <sup>7,8,9,10</sup> | 730  | 127.8 [127.4, 128.3] <sup>6,8,9,10</sup> | 766  | 133.4 [133.0, 133.8] <sup>6,7,9,10</sup> | 874  | 138.9 [138.5, 139.3] <sup>6,7,8,10</sup> | 605  | 143.6 [143.0, 144.1] <sup>6,7,8,9</sup> | < .001* |  |          |
| Weight<br>(kg)                       | Total | 552         | 24.23 [23.86, 24.60] <sup>7,8,9,10</sup> | 1491 | 26.29 [26.04, 26.54] <sup>6,8,9,10</sup> | 1596 | 29.74 [29.44, 30.04] <sup>6,7,9,10</sup> | 1731 | 33.25 [32.92, 33.58] <sup>6,7,8,10</sup> | 1143 | 37.16 [36.65, 37.67] <sup>6,7,8,9</sup> | < .001* |  |          |
|                                      | Girls | 291         | 23.87 [23.34, 24.40] <sup>7,8,9,10</sup> | 761  | 25.79 [25.45, 26.14] <sup>6,8,9,10</sup> | 830  | 29.45 [29.02, 29.88] <sup>6,7,9,10</sup> | 857  | 32.85 [32.37, 33.32] <sup>6,7,8,10</sup> | 538  | 36.44 [35.69, 37.19] <sup>6,7,8,9</sup> | < .001* |  |          |
|                                      | Boys  | 261         | 24.63 [24.12, 25.14] <sup>7,8,9,10</sup> | 730  | 26.81 [26.44, 27.17] <sup>6,8,9,10</sup> | 766  | 30.05 [29.63, 30.47] <sup>6,7,9,10</sup> | 874  | 33.64 [33.19, 34.10] <sup>6,7,8,10</sup> | 605  | 37.79 [37.10, 38.49] <sup>6,7,8,9</sup> | < .001* |  |          |
| BMI<br>(kg/m <sup>2</sup> )          | Total | 552         | 15.93 [15.76, 16.10] <sup>8,9,10</sup>   | 1491 | 16.16 [16.05, 16.28] <sup>8,9,10</sup>   | 1596 | 16.73 [16.60, 16.85] <sup>6,7,9,10</sup> | 1731 | 17.23 [17.10, 17.36] <sup>6,7,8,10</sup> | 1143 | 17.99 [17.80, 18.18] <sup>6,7,8,9</sup> | < .001* |  |          |
|                                      | Girls | 291         | 15.82 [15.57, 16.06] <sup>8,9,10</sup>   | 761  | 16.02 [15.87, 16.17] <sup>8,9,10</sup>   | 830  | 16.67 [16.50, 16.85] <sup>6,7,9,10</sup> | 857  | 17.13 [16.95, 17.32] <sup>6,7,8,10</sup> | 538  | 17.76 [17.48, 18.03] <sup>6,7,8,9</sup> | < .001* |  |          |
|                                      | Boys  | 261         | 16.06 [15.83, 16.29] <sup>8,9,10</sup>   | 730  | 16.32 [16.15, 16.48] <sup>8,9,10</sup>   | 766  | 16.78 [16.61, 16.96] <sup>6,7,9,10</sup> | 874  | 17.33 [17.15, 17.51] <sup>6,7,8,10</sup> | 605  | 18.19 [17.93, 18.45] <sup>6,7,8,9</sup> | < .001* |  |          |
| zBMI                                 | Total | 552         | 0.033 [-0.046, 0.113]                    | 1491 | -0.001 [-0.052, 0.050]                   | 1596 | 0.031 [-0.019, 0.081]                    | 1731 | 0.030 [-0.018, 0.078]                    | 1143 | 0.106 [0.043, 0.169]                    | .117    |  |          |
|                                      | Girls | 291         | -0.024 [-0.133, 0.085]                   | 761  | -0.068 [-0.137, 0.002]                   | 830  | -0.003 [-0.073, 0.066]                   | 857  | -0.021 [-0.091, 0.050]                   | 538  | 0.008 [-0.085, 0.100]                   | .690    |  |          |
|                                      | Boys  | 261         | 0.097 [-0.020, 0.213]                    | 730  | 0.069 [-0.005, 0.143]                    | 766  | 0.068 [-0.004, 0.140]                    | 874  | 0.080 [0.014, 0.145]                     | 605  | 0.194 [0.107, 0.280]                    | .145    |  |          |
| VO2max<br>(ml/kg/min <sup>-1</sup> ) | Total | 469         | 44.57 [44.28, 44.86] <sup>8,9,10</sup>   | 1312 | 45.00 [44.77, 45.23] <sup>8,9</sup>      | 1409 | 45.77 [45.49, 46.04] <sup>6,7</sup>      | 1549 | 46.08 [45.80, 46.37] <sup>6,7,10</sup>   | 1026 | 45.47 [45.09, 45.86] <sup>6,9</sup>     | < .001* |  |          |
|                                      | Girls | 248         | 44.15 [43.81, 44.48]                     | 670  | 44.30 [44.05, 44.55]                     | 747  | 44.77 [44.45, 45.08]                     | 782  | 44.82 [44.50, 45.15]                     | 476  | 44.37 [43.92, 44.82]                    | .129    |  |          |
|                                      | Boys  | 221         | 45.05 [44.57, 45.52] <sup>8,9,10</sup>   | 642  | 45.72 [45.34, 46.10] <sup>8,9</sup>      | 662  | 46.90 [46.45, 47.35] <sup>6,7</sup>      | 767  | 47.37 [46.91, 47.82] <sup>6,7,10</sup>   | 550  | 46.43 [45.83, 47.02] <sup>6,9</sup>     | < .001* |  |          |
| Pacer<br>(laps)                      | Total | 469         | 18.57 [17.76, 19.38] <sup>7,8,9,10</sup> | 1312 | 22.10 [21.45, 22.75] <sup>6,8,9,10</sup> | 1409 | 27.46 [26.68, 28.24] <sup>6,7,9,10</sup> | 1549 | 31.47 [30.66, 32.28] <sup>6,7,8</sup>    | 1026 | 32.57 [31.48, 33.66] <sup>6,7,8</sup>   | < .001* |  |          |
|                                      | Girls | 248         | 17.35 [16.39, 18.30] <sup>8,9,10</sup>   | 670  | 20.15 [19.43, 20.87] <sup>8,9,10</sup>   | 747  | 24.61 [23.71, 25.50] <sup>6,7,9,10</sup> | 782  | 27.88 [26.96, 28.81] <sup>6,7,8</sup>    | 476  | 29.43 [28.15, 30.70] <sup>6,7,8</sup>   | < .001* |  |          |
|                                      | Boys  | 221         | 19.95 [18.62, 21.28] <sup>7,8,9,10</sup> | 642  | 24.14 [23.05, 25.22] <sup>6,8,9,10</sup> | 662  | 30.68 [29.40, 31.96] <sup>6,7,9,10</sup> | 767  | 35.12 [33.83, 36.41] <sup>6,7,8</sup>    | 550  | 35.29 [33.61, 36.97] <sup>6,7,8</sup>   | < .001* |  |          |
| HGrel                                | Total | 446         | .416 [.405, .428] <sup>7,8,9,10</sup>    | 1215 | .452 [.446, .459] <sup>6,8,9,10</sup>    | 1342 | .481 [.475, .487] <sup>6,7,9,10</sup>    | 1421 | .499 [.493, .504] <sup>6,7,8</sup>       | 934  | .500 [.493, .507] <sup>6,7,8</sup>      | < .001* |  |          |
|                                      | Girls | 231         | .390 [.374, .406] <sup>7,8,9,10</sup>    | 617  | .434 [.425, .443] <sup>6,8,9,10</sup>    | 696  | .458 [.450, .467] <sup>6,7,9,10</sup>    | 698  | .477 [.469, .485] <sup>6,7,8</sup>       | 444  | .482 [.472, .492] <sup>6,7,8</sup>      | < .001* |  |          |
|                                      | Boys  | 215         | .445 [.429, .461] <sup>7,8,9,10</sup>    | 598  | .471 [.461, .480] <sup>6,8,9,10</sup>    | 646  | .506 [.497, .515] <sup>6,7</sup>         | 723  | .519 [.511, .528] <sup>6,7</sup>         | 490  | .516 [.506, .526] <sup>6,7</sup>        | < .001* |  |          |
| PU<br>(number)                       | Total | 549         | 6.82 [6.17, 7.47] <sup>7,8,9,10</sup>    | 1481 | 8.85 [8.39, 9.31] <sup>6,8,9,10</sup>    | 1570 | 10.95 [10.46, 11.43] <sup>6,7,9</sup>    | 1710 | 12.01 [11.51, 12.52] <sup>6,7,8</sup>    | 111  | 11.97 [11.36, 12.59] <sup>6,7</sup>     | < .001* |  |          |
|                                      | Girls | 291         | 5.53 [4.76, 6.30] <sup>7,8,9,10</sup>    | 751  | 7.57 [7.00, 8.14] <sup>6,9,10</sup>      | 813  | 8.59 [8.03, 9.15] <sup>6,10</sup>        | 845  | 9.75 [9.16, 10.35] <sup>6,7</sup>        | 523  | 10.14 [9.35, 10.92] <sup>6,7,8</sup>    | < .001* |  |          |
|                                      | Boys  | 258         | 8.28 [7.23, 9.33] <sup>8,9,10</sup>      | 730  | 10.17 [9.46, 10.88] <sup>8,9,10</sup>    | 757  | 13.47 [12.71, 14.24] <sup>6,7</sup>      | 865  | 14.23 [13.44, 15.01] <sup>6,7</sup>      | 588  | 13.60 [12.69, 14.52] <sup>6,7</sup>     | < .001* |  |          |

|                                    |       |     |                                          |      |                                          |      |                                          |      |                                          |      |                                         |         |
|------------------------------------|-------|-----|------------------------------------------|------|------------------------------------------|------|------------------------------------------|------|------------------------------------------|------|-----------------------------------------|---------|
| CU<br>(number)                     | Total | 550 | 10.92 [9.88, 11.97] <sup>7,8,9,10</sup>  | 1489 | 16.69 [15.86, 17.53] <sup>6,8,9,10</sup> | 1582 | 27.89 [26.64, 29.14] <sup>6,7,9,10</sup> | 1725 | 36.01 [34.63, 37.39] <sup>6,7,8,10</sup> | 1132 | 39.55 [37.77, 41.34] <sup>6,7,8,9</sup> | < .001* |
|                                    | Girls | 290 | 11.00 [9.72, 12.28] <sup>7,8,9,10</sup>  | 757  | 18.07 [16.85, 19.29] <sup>6,8,9,10</sup> | 822  | 27.94 [26.22, 29.65] <sup>6,7,9,10</sup> | 851  | 36.95 [34.94, 38.95] <sup>6,7,8</sup>    | 535  | 39.83 [37.29, 42.38] <sup>6,7,8</sup>   | < .001* |
|                                    | Boys  | 260 | 10.84 [9.14, 12.53] <sup>8,9,10</sup>    | 732  | 15.27 [14.15, 16.39] <sup>8,9,10</sup>   | 760  | 27.85 [26.01, 29.68] <sup>6,7,9,10</sup> | 874  | 35.10 [33.20, 36.99] <sup>6,7,8,10</sup> | 597  | 39.30 [36.80, 41.81] <sup>6,7,8,9</sup> | < .001* |
| SLJ<br>(cm)                        | Total | 550 | 107.2 [105.7, 108.7] <sup>7,8,9,10</sup> | 1491 | 115.1 [114.1, 116.0] <sup>6,8,9,10</sup> | 1585 | 124.1 [123.1, 125.1] <sup>6,7,9,10</sup> | 1728 | 132.8 [131.8, 133.8] <sup>6,7,8,10</sup> | 1136 | 137.1 [135.8, 138.4] <sup>6,7,8,9</sup> | < .001* |
|                                    | Girls | 290 | 103.8 [102.0, 105.7] <sup>7,8,9,10</sup> | 758  | 111.6 [110.3, 112.9] <sup>6,8,9,10</sup> | 824  | 120.1 [118.8, 121.4] <sup>6,7,9,10</sup> | 857  | 129.2 [127.9, 130.6] <sup>6,7,8,10</sup> | 532  | 133.9 [132.1, 135.6] <sup>6,7,8,9</sup> | < .001* |
|                                    | Boys  | 260 | 111.0 [108.6, 113.3] <sup>7,8,9,10</sup> | 733  | 118.6 [117.3, 120.0] <sup>6,8,9,10</sup> | 761  | 128.5 [127.0, 130.0] <sup>6,7,9,10</sup> | 871  | 136.3 [134.9, 137.8] <sup>6,7,8,10</sup> | 604  | 140.0 [138.1, 141.8] <sup>6,7,8,9</sup> | < .001* |
| <b>Concentration</b>               |       |     |                                          |      |                                          |      |                                          |      |                                          |      |                                         |         |
| d2-R<br>(score)                    | Total |     |                                          | 123  | 72.50 [69.54, 75.45] <sup>8,9,10</sup>   | 414  | 79.67 [77.52, 81.81] <sup>7,9,10</sup>   | 508  | 94.19 [92.38, 96.00] <sup>7,8</sup>      | 342  | 98.23 [95.56, 100.89] <sup>7,8</sup>    | < .001* |
|                                    | Girls |     |                                          | 67   | 73.90 [69.60, 78.19] <sup>9,10</sup>     | 218  | 80.13 [77.02, 83.24] <sup>9,10</sup>     | 257  | 96.99 [94.47, 99.51] <sup>7,8</sup>      | 162  | 100.75 [96.76, 104.73] <sup>7,8</sup>   | < .001* |
|                                    | Boys  |     |                                          | 56   | 70.82 [66.74, 74.90] <sup>9,10</sup>     | 196  | 79.15 [76.19, 82.11] <sup>9,10</sup>     | 251  | 91.32 [88.75, 93.90] <sup>7,8</sup>      | 180  | 95.96 [92.37, 99.54] <sup>7,8</sup>     | < .001* |
| <b>HRQOL</b>                       |       |     |                                          |      |                                          |      |                                          |      |                                          |      |                                         |         |
| HRQOL Total<br>(score)             | Total |     |                                          |      |                                          |      |                                          | 326  | 76.73 [75.63, 77.83]                     | 672  | 75.78 [74.98, 76.58]                    | .179    |
|                                    | Girls |     |                                          |      |                                          |      |                                          | 176  | 77.06 [75.68, 78.44]                     | 339  | 77.08 [75.97, 78.19]                    | .987    |
|                                    | Boys  |     |                                          |      |                                          |      |                                          | 150  | 76.34 [74.55, 78.12]                     | 333  | 74.46 [73.31, 75.61]                    | .066    |
| Physical<br>well-being<br>(score)  | Total |     |                                          |      |                                          |      |                                          | 326  | 79.52 [77.87, 81.18]                     | 672  | 79.00 [77.82, 80.17]                    | .612    |
|                                    | Girls |     |                                          |      |                                          |      |                                          | 176  | 79.73 [77.59, 81.88]                     | 339  | 78.60 [76.92, 80.28]                    | .429    |
|                                    | Boys  |     |                                          |      |                                          |      |                                          | 150  | 79.28 [76.70, 81.86]                     | 333  | 79.40 [77.74, 81.06]                    | .937    |
| Emotional<br>well-being<br>(score) | Total |     |                                          |      |                                          |      |                                          | 326  | 83.94 [82.66, 85.22] <sup>10</sup>       | 672  | 82.17 [81.11, 83.22] <sup>9</sup>       | .036*   |
|                                    | Girls |     |                                          |      |                                          |      |                                          | 176  | 83.53 [81.89, 85.18]                     | 339  | 83.14 [81.71, 84.58]                    | .751    |
|                                    | Boys  |     |                                          |      |                                          |      |                                          | 150  | 84.42 [82.40, 86.44] <sup>10</sup>       | 333  | 81.17 [79.62, 82.73] <sup>9</sup>       | .013*   |
| Self-esteem<br>(score)             | Total |     |                                          |      |                                          |      |                                          | 326  | 61.73 [59.48, 63.99]                     | 672  | 61.61 [60.07, 63.15]                    | .929    |
|                                    | Girls |     |                                          |      |                                          |      |                                          | 176  | 61.49 [58.74, 64.25]                     | 339  | 62.86 [60.75, 64.97]                    | .474    |
|                                    | Boys  |     |                                          |      |                                          |      |                                          | 150  | 62.01 [58.28, 65.75]                     | 333  | 60.34 [58.09, 62.60]                    | .406    |
| Family<br>(score)                  | Total |     |                                          |      |                                          |      |                                          | 326  | 84.33 [82.63, 86.03]                     | 672  | 84.09 [82.88, 85.29]                    | .819    |
|                                    | Girls |     |                                          |      |                                          |      |                                          | 176  | 86.62 [84.83, 88.41]                     | 339  | 86.20 [84.68, 87.71]                    | .769    |
|                                    | Boys  |     |                                          |      |                                          |      |                                          | 150  | 81.64 [78.64, 84.64]                     | 333  | 81.94 [80.09, 83.79]                    | .846    |
| Friends<br>(score)                 | Total |     |                                          |      |                                          |      |                                          | 326  | 76.83 [75.02, 78.65]                     | 672  | 77.24 [75.95, 78.52]                    | .722    |
|                                    | Girls |     |                                          |      |                                          |      |                                          | 176  | 76.66 [74.22, 79.09]                     | 339  | 78.88 [77.11, 80.64]                    | .155    |
|                                    | Boys  |     |                                          |      |                                          |      |                                          | 150  | 77.04 [74.30, 79.78]                     | 333  | 75.57 [73.71, 77.43]                    | .373    |

|                   |       |  |     |                                    |     |                                   |       |
|-------------------|-------|--|-----|------------------------------------|-----|-----------------------------------|-------|
| School<br>(score) | Total |  | 326 | 73.84 [71.99, 75.70] <sup>10</sup> | 672 | 70.50 [69.09, 71.90] <sup>9</sup> | .005* |
|                   | Girls |  | 176 | 74.11 [71.61, 76.61]               | 339 | 72.62 [70.65, 74.58]              | .372  |
|                   | Boys  |  | 150 | 73.53 [70.73, 76.33] <sup>10</sup> | 333 | 68.34 [66.33, 70.34] <sup>9</sup> | .003* |

Values are number or mean [CI 95%]. BMI = body mass index, zBMI = standardized BMI, HGrel = handgrip strength relativized to body weight, PU = Push-Ups, CU = Curl-Ups, SLJ = Standing long jump, d2-R = concentration test, HRQOL = health-related quality of life; \*  $p < .05$ , <sup>6 7 8 9 10</sup> = significant post-hoc differences between age groups
