# Supplementary material for: A Better Cardiopulmonary Fitness Is Associated with Improved Concentration Level and Health-Related Quality of Life in Primary School Children
Source: MDPI journal article supplement (doi:10.3390/jcm11051326), 2022-02-28
Supplement: s1 [file s1]

**Supplementary Table S2.** Multiple linear regression analyses between HRQOL sub-scales and physical fitness parameters.

| Coefficients                                    | <i>b</i> [95% CI] <sup>a</sup> | Se <sub>b</sub> <sup>a</sup> | $\beta$ | <i>t</i> | <i>p</i> |
|-------------------------------------------------|--------------------------------|------------------------------|---------|----------|----------|
| Dependent Variable: <b>Physical well-being</b>  |                                |                              |         |          |          |
| BMI                                             | .119 [-.309, .569]             | 0.23                         | 0.02    | 0.571    | .568     |
| VO2max                                          | .384 [.167, .589]              | 0.11                         | 0.16    | 3.537    | < .001 * |
| HGrel                                           | .377 [-12.864, 12.953]         | 6.379                        | 0.00    | 0.063    | .950     |
| PU                                              | .115 [-.021, .253]             | 0.07                         | 0.08    | 1.803    | .072     |
| CU                                              | .047 [.013, .081]              | 0.02                         | 0.10    | 2.664    | .008 *   |
| SLJ                                             | .036 [-.034, .107]             | 0.04                         | 0.05    | 1.045    | .297     |
| Dependent Variable: <b>Emotional well-being</b> |                                |                              |         |          |          |
| Age                                             | -2.979 [-5.587, -.237]         | 1.340                        | -0.08   | -2.345   | .019 *   |
| BMI                                             | -.025 [-.383, .350]            | 0.18                         | -0.01   | -0.141   | .888     |
| VO2max                                          | .143 [-.041, .324]             | 0.10                         | 0.07    | 1.554    | .121     |
| HGrel                                           | -2.363 [-12.621, 8.156]        | 5.162                        | -0.02   | -0.469   | .639     |
| PU                                              | .046 [-.067, .153]             | 0.05                         | 0.04    | 0.846    | .398     |
| CU                                              | .020 [-.010, .050]             | 0.01                         | 0.05    | 1.351    | .177     |
| SLJ                                             | .056 [-.001, .113]             | 0.03                         | 0.09    | 1.926    | .054     |
| Dependent Variable: <b>Self-esteem</b>          |                                |                              |         |          |          |
| BMI                                             | .043 [-.499, .579]             | 0.27                         | 0.01    | 0.155    | .877     |
| VO2max                                          | .349 [.064, .635]              | 0.14                         | 0.11    | 2.389    | .017 *   |
| HGrel                                           | 29.687 [13.509, 44.924]        | 7.743                        | 0.16    | 3.698    | < .001 * |
| PU                                              | -.038 [-.193, .115]            | 0.08                         | -0.02   | -0.437   | .662     |
| CU                                              | .035 [-.010, .079]             | 0.02                         | 0.05    | 1.473    | .141     |
| SLJ                                             | -.058 [-.143, .029]            | 0.05                         | -0.06   | -1.261   | .208     |
| Dependent Variable: <b>Family</b>               |                                |                              |         |          |          |
| Sex                                             | 4.214 [2.035, 6.430]           | 1.091                        | 0.14    | 3.938    | < .001 * |
| CU                                              | .032 [-.001, .066]             | 0.02                         | 0.07    | 1.919    | .055     |
| Dependent Variable: <b>Friends</b>              |                                |                              |         |          |          |
| BMI                                             | -.017 [-.488, .499]            | 0.23                         | -0.00   | -0.075   | .940     |
| VO2max                                          | .339 [.125, .565]              | 0.12                         | 0.13    | 2.829    | .005 *   |
| HGrel                                           | -2.858 [-15.908, 9.980]        | 6.723                        | -0.02   | -0.433   | .665     |
| PU                                              | .014 [-.129, .163]             | 0.07                         | 0.01    | 0.200    | .842     |
| CU                                              | .059 [.021, .097]              | 0.02                         | 0.11    | 2.991    | .003 *   |
| SLJ                                             | .018 [-.047, .085]             | 0.03                         | 0.02    | 0.477    | .634     |
| Dependent Variable: <b>School</b>               |                                |                              |         |          |          |
| Age                                             | -2.681 [-6.100, .844]          | 1.703                        | -0.05   | -1.518   | .129     |
| BMI                                             | -.664 [-1.177, -.152]          | 0.26                         | -0.11   | -2.694   | .007 *   |
| VO2max                                          | .518 [.249, .775]              | 0.13                         | 0.19    | 4.056    | < .001 * |
| HGrel                                           | -6.923 [-21.203, 6.986]        | 6.985                        | -0.04   | -0.989   | .323     |
| PU                                              | .063 [-.087, .215]             | 0.08                         | 0.04    | 0.847    | .397     |
| CU                                              | .041 [.004, .081]              | 0.02                         | 0.07    | 1.983    | .048 *   |
| SLJ                                             | -.042 [-.124, .039]            | 0.04                         | -0.05   | -1.053   | .293     |

<sup>a</sup> Se<sub>b</sub> = Confidence interval and Coefficients Standard Error per BCa-Bootstrapping with 2.000 BCa samples;  
 $\beta$  = standardized  $\beta$ , BMI = body mass index, HGrel = handgrip strength relativized to body mass, PU = Push-Ups,  
CU = Curl-Ups, SLJ = Standing long jump, HRQOL total = KINDL total score; \*  $p < .05$
