# Supplementary material for: A Better Cardiopulmonary Fitness Is Associated with Improved Concentration Level and Health-Related Quality of Life in Primary School Children
Source: MDPI journal article supplement (doi:10.3390/jcm11051326), 2022-02-28
Supplement: s1 [file s1]

**Supplementary Table S3.** Correlation coefficients of all PF parameters, concentration score and all HRQOL scores

|                             | M      | SD    | Age            | BMI            | VO2max        | Pacer         | HGrel         | PU            | CU            | SLJ           | d2-R          | HRQOL total  | Physical well-being | Emotional well-being | Self-esteem  | Family       | Friends      | School |
|-----------------------------|--------|-------|----------------|----------------|---------------|---------------|---------------|---------------|---------------|---------------|---------------|--------------|---------------------|----------------------|--------------|--------------|--------------|--------|
| <b>Age</b>                  | 9.85   | 0.51  | --             |                |               |               |               |               |               |               |               |              |                     |                      |              |              |              |        |
|                             |        |       | 2887           |                |               |               |               |               |               |               |               |              |                     |                      |              |              |              |        |
|                             |        |       | .136**         | --             |               |               |               |               |               |               |               |              |                     |                      |              |              |              |        |
| <b>BMI</b>                  | 17.53  | 2.97  | [.100, .172]   |                |               |               |               |               |               |               |               |              |                     |                      |              |              |              |        |
|                             |        |       | 2874           | 2874           |               |               |               |               |               |               |               |              |                     |                      |              |              |              |        |
|                             |        |       | -.049*         | -.388**        | --            |               |               |               |               |               |               |              |                     |                      |              |              |              |        |
| <b>VO2max</b>               | 45.84  | 5.97  | [-.087, -.010] | [-.420, -.354] |               |               |               |               |               |               |               |              |                     |                      |              |              |              |        |
|                             |        |       | 2575           | 2567           | 2575          |               |               |               |               |               |               |              |                     |                      |              |              |              |        |
|                             |        |       | .048*          | -.374**        | .995**        | --            |               |               |               |               |               |              |                     |                      |              |              |              |        |
| <b>Pacer</b>                | 31.91  | 16.91 | [.009, .086]   | [-.407, -.340] | [.995, .996]  |               |               |               |               |               |               |              |                     |                      |              |              |              |        |
|                             |        |       | 2575           | 2567           | 2575          | 2575          |               |               |               |               |               |              |                     |                      |              |              |              |        |
|                             |        |       | .024           | -.440**        | .403**        | .405**        | --            |               |               |               |               |              |                     |                      |              |              |              |        |
| <b>HGrel</b>                | 0.499  | 0.113 | [-.017, .064]  | [-.472, -.407] | [.366, .438]  | [.368, .440]  |               |               |               |               |               |              |                     |                      |              |              |              |        |
|                             |        |       | 2355           | 2355           | 2122          | 2122          | 2355          |               |               |               |               |              |                     |                      |              |              |              |        |
|                             |        |       | .001           | -.281**        | .546**        | -.545**       | .435**        | --            |               |               |               |              |                     |                      |              |              |              |        |
| <b>PU</b>                   | 12.00  | 10.56 | [-.036, .038]  | [-.315, -.246] | [.518, .573]  | [.517, .572]  | [.401, .467]  |               |               |               |               |              |                     |                      |              |              |              |        |
|                             |        |       | 2821           | 2813           | 2525          | 2525          | 2311          | 2821          |               |               |               |              |                     |                      |              |              |              |        |
|                             |        |       | .076**         | -.214**        | .282**        | -.290**       | .166**        | .238**        | --            |               |               |              |                     |                      |              |              |              |        |
| <b>CU</b>                   | 37.41  | 29.79 | [.040, .113]   | [-.248, -.178] | [.246, .317]  | [.254, .325]  | [.127, .206]  | [.203, .273]  |               |               |               |              |                     |                      |              |              |              |        |
|                             |        |       | 2857           | 2849           | 2556          | 2556          | 2338          | 2810          | 2857          |               |               |              |                     |                      |              |              |              |        |
|                             |        |       | .119**         | -.311**        | .537**        | .547**        | .501**        | .496**        | .325**        | --            |               |              |                     |                      |              |              |              |        |
| <b>SLJ</b>                  | 134.52 | 21.66 | [.082, .155]   | [-.344, -.278] | [.508, .563]  | [.520, .574]  | [.469, .530]  | [.467, .523]  | [.292, .358]  |               |               |              |                     |                      |              |              |              |        |
|                             |        |       | 2864           | 2855           | 2568          | 2568          | 2342          | 2808          | 2839          | 2864          |               |              |                     |                      |              |              |              |        |
|                             |        |       | .089**         | -.108**        | .225**        | .232**        | -.002         | .135**        | .119**        | .202**        | --            |              |                     |                      |              |              |              |        |
| <b>d2-R</b>                 | 95.81  | 22.68 | [.022, .155]   | [-.174, -.041] | [.157, .291]  | [.164, .298]  | [-.072, .068] | [.068, .202]  | [.051, .185]  | [.137, .266]  |               |              |                     |                      |              |              |              |        |
|                             |        |       | 850            | 845            | 771           | 771           | 786           | 830           | 837           | 844           | 850           |              |                     |                      |              |              |              |        |
|                             |        |       | -.063*         | -.159**        | .247**        | .244**        | .134**        | .179**        | .181**        | .183**        | .128**        | --           |                     |                      |              |              |              |        |
| <b>HRQOL total</b>          | 76.09  | 10.45 | [-.125, -.001] | [-.219, -.098] | [.185, .307]  | [.182, .304]  | [.069, .198]  | [.118, .239]  | [.120, .241]  | [.122, .242]  | [.033, .221]  |              |                     |                      |              |              |              |        |
|                             |        |       | 998            | 991            | 913           | 913           | 888           | 976           | 988           | 988           | 422           | 998          |                     |                      |              |              |              |        |
|                             |        |       | -.034          | -.113**        | .245**        | .243**        | .125**        | .198**        | .164**        | .201**        | .114*         | .575**       | --                  |                      |              |              |              |        |
| <b>Physical well-being</b>  | 79.17  | 15.42 | [-.096, .028]  | [-.174, -.051] | [.183, .305]  | [.181, .303]  | [.060, .190]  | [.137, .257]  | [.103, .224]  | [.140, .260]  | [.018, .207]  | [.532, .615] |                     |                      |              |              |              |        |
|                             |        |       | 998            | 991            | 913           | 913           | 888           | 976           | 988           | 988           | 422           | 998          | 998                 |                      |              |              |              |        |
|                             |        |       | -.069*         | -.100**        | .150**        | .146**        | .061          | .123**        | .091**        | .126**        | .142**        | .655**       | .383**              | --                   |              |              |              |        |
| <b>Emotional well-being</b> | 82.75  | 13.30 | [-.130, -.007] | [-.161, -.038] | [.086, .213]  | [.082, .209]  | [-.005, .126] | [.061, .184]  | [.029, .153]  | [.064, .186]  | [.047, .234]  | [.618, .689] | [.328, .434]        |                      |              |              |              |        |
|                             |        |       | 998            | 991            | 913           | 913           | 888           | 976           | 988           | 988           | 422           | 998          | 998                 | 998                  |              |              |              |        |
|                             |        |       | -.019          | -.108**        | .148**        | .148**        | .153**        | .104**        | .096**        | .117**        | .025          | .632**       | .244**              | .275**               | --           |              |              |        |
| <b>Self-esteem</b>          | 61.65  | 20.47 | [-.081, .043]  | [-.169, -.046] | [.084, .211]  | [.084, .211]  | [.088, .217]  | [.042, .166]  | [.034, .158]  | [.055, .178]  | [-.071, .120] | [.593, .667] | [.184, .301]        | [.217, .332]         |              |              |              |        |
|                             |        |       | 998            | 991            | 913           | 913           | 888           | 976           | 988           | 988           | 422           | 998          | 998                 | 998                  | 998          |              |              |        |
|                             |        |       | -.030          | -.021          | .013          | .011          | .015          | .024          | .056          | .022          | .053          | .579**       | .154**              | .277**               | .186**       | --           |              |        |
| <b>Family</b>               | 84.17  | 15.77 | [-.092, .032]  | [-.083, .042]  | [-.052, .078] | [-.054, .076] | [-.051, .080] | [-.039, .086] | [-.006, .118] | [-.041, .084] | [-.043, .148] | [.536, .619] | [.093, .214]        | [.219, .333]         | [.126, .246] |              |              |        |
|                             |        |       | 998            | 991            | 913           | 913           | 888           | 976           | 988           | 988           | 422           | 998          | 998                 | 998                  | 998          | 998          |              |        |
|                             |        |       | .000           | -.084**        | .167**        | .166**        | .056          | .094**        | .141**        | .110**        | .013          | .665**       | .225**              | .375**               | .286**       | .301**       | --           |        |
| <b>Friends</b>              | 77.11  | 16.85 | [-.062, .062]  | [-.146, -.022] | [.103, .229]  | [.103, .229]  | [-.010, .121] | [.031, .156]  | [.080, .202]  | [.048, .171]  | [-.082, .109] | [.629, .698] | [.166, .283]        | [.320, .427]         | [.228, .342] | [.243, .356] |              |        |
|                             |        |       | 998            | 991            | 913           | 913           | 888           | 976           | 988           | 988           | 422           | 998          | 998                 | 998                  | 998          | 998          | 998          |        |
|                             |        |       | -.089**        | -.162**        | .212**        | .207**        | .079*         | .137**        | .129**        | .116**        | .153**        | .649**       | .244**              | .308**               | .218**       | .307**       | .316**       | --     |
| <b>School</b>               | 71.59  | 18.16 | [-.150, -.027] | [-.222, -.101] | [.149, .273]  | [.144, .269]  | [.014, .144]  | [.075, .198]  | [.067, .190]  | [.054, .177]  | [.058, .245]  | [.611, .683] | [.184, .301]        | [.251, .363]         | [.158, .277] | [.250, .362] | [.258, .370] |        |
|                             |        |       | 998            | 991            | 913           | 913           | 888           | 976           | 988           | 988           | 422           | 998          | 998                 | 998                  | 998          | 998          | 998          | 998    |

Data are given as  $r$  [CI 95%]  $n$ ; BMI = body mass index, HGrel = handgrip strength relativized to body weight, PU = Push-Ups, CU = Curl-Ups, SLJ = Standing long jump, d2-R = concentration test, HRQOL = health-related quality of life; \*  $p < .05$ , \*\*  $p < .01$
